# Supplementary material
Source: PubMed Central journal article supplement (PMC9247094)
Supplement: 41541_2022_487_MOESM2_ESM.pdf [file 41541_2022_487_MOESM2_ESM.pdf]

1 Supplemental Figures

2

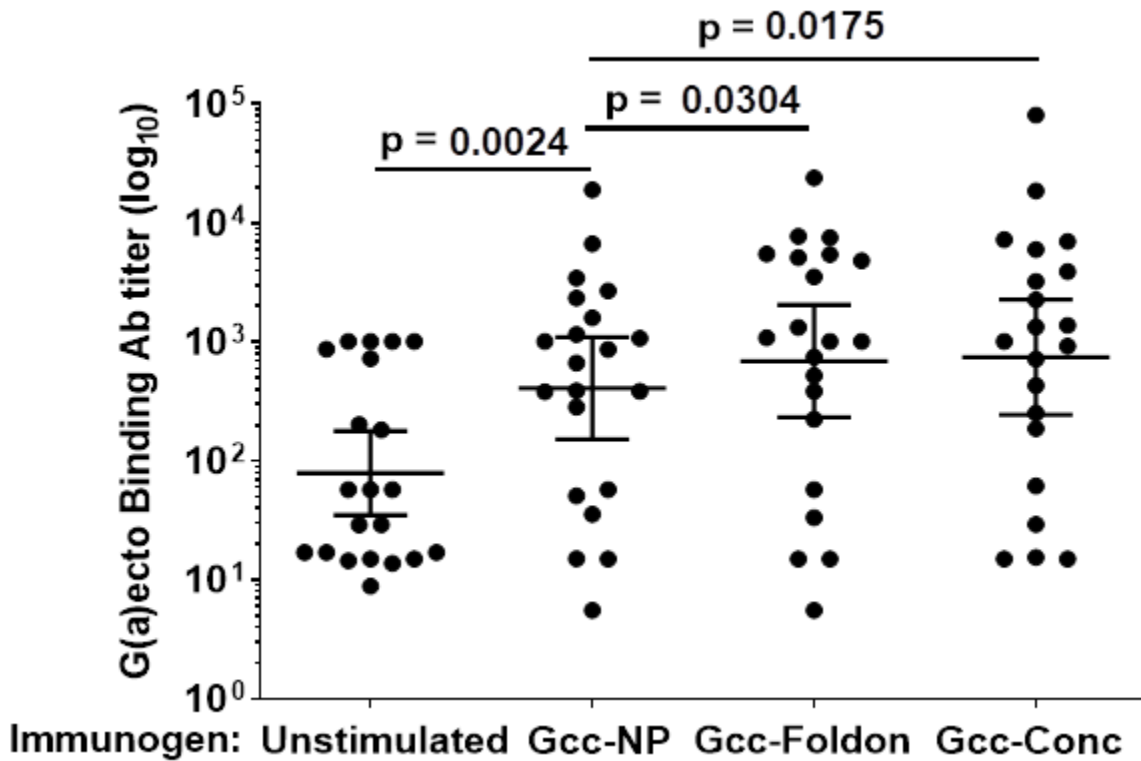

3

4 **Supp Fig 1. Gcc-NP Foldon elicits lower Abs to the ectodomain of G than Gcc-Foldon or**

5 **Gcc-Conc in the MIMIC® system. G(a)ecto-binding titers were measured after stimulating cells**

6 with Gcc-NP, Gcc-Foldon or Gcc-Conc in MIMIC® and determined using the Antibody Forensics

7 technique with Luminex beads coated with the ectodomain of RSV G of strain A2. Each dot

8 represents a response from an individual donor and the bar indicates the geometric mean and error

9 bars represent 95% confidence intervals. For comparison, the untreated control is labeled as none.

10 N = 21. All statistical values were performed using the Student's *t*-test.
